# Supplementary material for: Toward a typology of river functioning: a comprehensive study of POM composition at multi-rivers scale
Source: Copernicus journal article supplement (doi:10.5194/egusphere-2025-158), 2025-02-13
Supplement: Supplementary file [file egusphere-2025-158-AC1-supplement.pdf]

## Reviewer 1

---

Dear associate Editor of Biogeosciences journal,

The work of Ferchiche et al deals with the construction of a typology of 23 French temperate rivers based on a set of national databases and previous works encompassing a wide range of parameters of POM (bulk and stable isotopic) able to determine the nature of POM (phytoplankton versus terrestrial OM, both labile and refractory and to a less extent, anthropogenic OM). Authors tried to link these parameters with many catchment properties belongs to anthropogenic, climatic and to a less extent geomorphological forcings; they naturally included the hydrological context (water, SPM discharges). In order to achieve their goal, they used Bayesian mixing model, seldomly used in our scientific community. In addition, POM signatures (sources) are not based on the sources or proxy (lake phytoplankton as a proxy for river ones) but used a methodology previously developed by the author able to track the change of POM parameters during the journey in river system or within its water column. For all these points, this work is original and deserves to be published in the journal.

However, this work suffers of many issues making its publication impossible in the present form, among them: (i) the lack of consideration of a significant source of POM in their work (lithospheric), (ii) the sampling period of the rivers vs POM composition, (iii) the choice of the river systems (the over representation of the small rivers coming from the same area (SW France) associated to the size of the analysed watershed, and (iv) the choice of basin metrics and descriptors. Hereafter the detail of these 4 major issues.

We would like to thank Reviewer 1 for the comprehensive analysis of our work, pointing out the quality of the manuscript while identifying important ways to improve its form and content. We are glad to address all of Reviewer1's concerns.

**1-Lithospheric, (fossil or geological) POM source.** Authors consider 4 sources (3 majors): aquatic productivity (phytoplankton), labile and refractory terrestrial POM and anthropogenic POM. However, it is well known that rock-derived POM, having various labelling in many studies (lithospheric, geogenic, fossil etc) can be a substantial POM sources in rivers. As an example, authors should take a look in literature, especially for the well documented Rhone River which is also one of the studied rivers in this work. We need to wait the end of the ms (section 4.3, L578f) to see a possible lithospheric origin of refractory terrestrial POM. Authors should state at the beginning of this ms that terrestrial refractory could be lithospheric and mix with either deep soil horizons or surficial sediments stored in the catchments; and clearly rewrite their conclusion about the type II since almost 1/5 of the POC of the Rhone River is rock-derived. Additionally, the difference between soil and rocks refractory POM could be refined with C/N ratio where values for the fossil counterpart are normally excessively high (no more Nitrogen) compared to refractory POM soil-derived; as much as they can, authors should better explore the C/N ratio.

We agree with this statement. We will better introduce and integrate the bedrock potential origin of POM, and its influence on the refractory terrestrial source, given isotopic and elemental signatures. Effectively, some soil and rock-derived POM may be distinguished by their  $\delta^{13}\text{C}$  or C/N values.

However, studies focused on petrogenic POM that measured directly this source showed a great variability of C/N ratio depending on the geology (at Taiwan island scale, C/N ratio ranges from

3 for sandstone to 17 for turbidites, and from 3.8 to 9.7 for rock-derived river sediment POM; Liu et al. 2017; Hilton et al. 2010).

In addition, the soil POM C/N ratio is correlated to the mineral-associated POM C/N ratio, and can also span a great range of values (Europe scale, 2 to 100 vs. 2 to 30, respectively; Cotrufo et al. 2019).

Finally, as rock-derived OM dominates the riverbed sediment OM in major rivers like the Amazon River (Sun et al. 2017) or the Rhône River (Harmelin-Vivien et al. 2010), and as riverbed sediment is subject to resuspension, we are keen to better address these geological pathways resulting in complex refractory terrestrial suspended POM sources.

**Cotrufo, M.F.**, Ranalli, M.G., Haddix, M.L. *et al.* Soil carbon storage informed by particulate and mineral-associated organic matter. *Nat. Geosci.* **12**, 989–994 (2019). <https://doi.org/10.1038/s41561-019-0484-6>

**Harmelin-Vivien, M.**, Dierking, J., Bănar, D. *et al.* Seasonal variation in stable C and N isotope ratios of the Rhone River inputs to the Mediterranean Sea (2004–2005). *Biogeochemistry* **100**, 139–150 (2010). <https://doi.org/10.1007/s10533-010-9411-z>

**Robert G. Hilton**, Albert Galy, Niels Hovius, Ming-Jame Horng, Hongey Chen, The isotopic composition of particulate organic carbon in mountain rivers of Taiwan, *Geochimica et Cosmochimica Acta*, Volume 74, Issue 11, 2010, Pages 3164–3181, ISSN 0016-7037, <https://doi.org/10.1016/j.gca.2010.03.004>.

**Liu, K. K.**, and S. J. Kao, 2007: A three end-member mixing model based on isotopic composition and elemental ratio. *Terr. Atmos. Ocean. Sci.*, **18**, 1067–1075, doi: 10.3319/TAO.2007.18.5.1067(Oc).

**Sun, S.**, Schefuß, E., Mulitza, S., Chiessi, C. M., Sawakuchi, A. O., Zabel, M., Baker, P. A., Hefter, J., and Mollenhauer, G.: Origin and processing of terrestrial organic carbon in the Amazon system: lignin phenols in river, shelf, and fan sediments, *Biogeosciences*, **14**, 2495–2512, <https://doi.org/10.5194/bg-14-2495-2017>, 2017.

**2-Sampling period (table 1).** I have a major concern about the sampling period: a significant number of rivers has only 1 year sampling. This is a serious bias as 1 year is far to be enough to capture the hydrological dynamics of the river. Indeed, since the control of the hydrology in this NW Europe is due to NAO index with a cycle of 4–8 years, for a sampling year, the hydrology could be lower or higher than it is expected. If the authors consider that the hydrology (water discharge) is a key point controlling the contribution of POM sources (their statement), then the average nature of POM is not well constraint...I think this a weakness point. I would suggest to not consider the rivers with only 1 year sampling period (at least) and authors should consider this bias in the discussion.

Indeed, our data acquisition strategy of 1-year river samplings does not allow for capturing the inter-annual hydrological dynamics of the rivers and is not representative of their overall hydrological dynamics. This was in fact not our aim. Our aim, however, was to describe 23 sets of POM sources dynamics and compare them with 23 sets of environmental forcings to establish a typology of POM dynamics. For this reason, we do not pretend to bind a typology to these particular 23 rivers, but rather bind POM sources dynamics with typical settings of temperate environmental forcings. This would imply that a river may belong to a type in a given year but to another type in another year.

For performing the fuzzy clustering in the manuscript (Fig. 5), we used, when a river was sampled during two or more years, only one of the sampled years. The idea was not to over-represent these rivers compared to one-year sampled rivers in the analysis. To check 1) if river type depends on sampling year and 2) for a possible bias between 1-year sampled rivers and multi-year sampled rivers due to over-representation of the latter, we performed another fuzzy clustering (same caption as Fig. 5), using all the sampling years. It results that the river typology is very similar to that of Fig. 5 and that each of the rivers that were sampled for more than a

year belongs to the same type, whatever the sampling year, except the Leyre River. The Leyre River switched from Type III in 2008 to Type I in 2009. Note that all the southwestern rivers belong to types I and III. The Leyre River is a southwestern river.

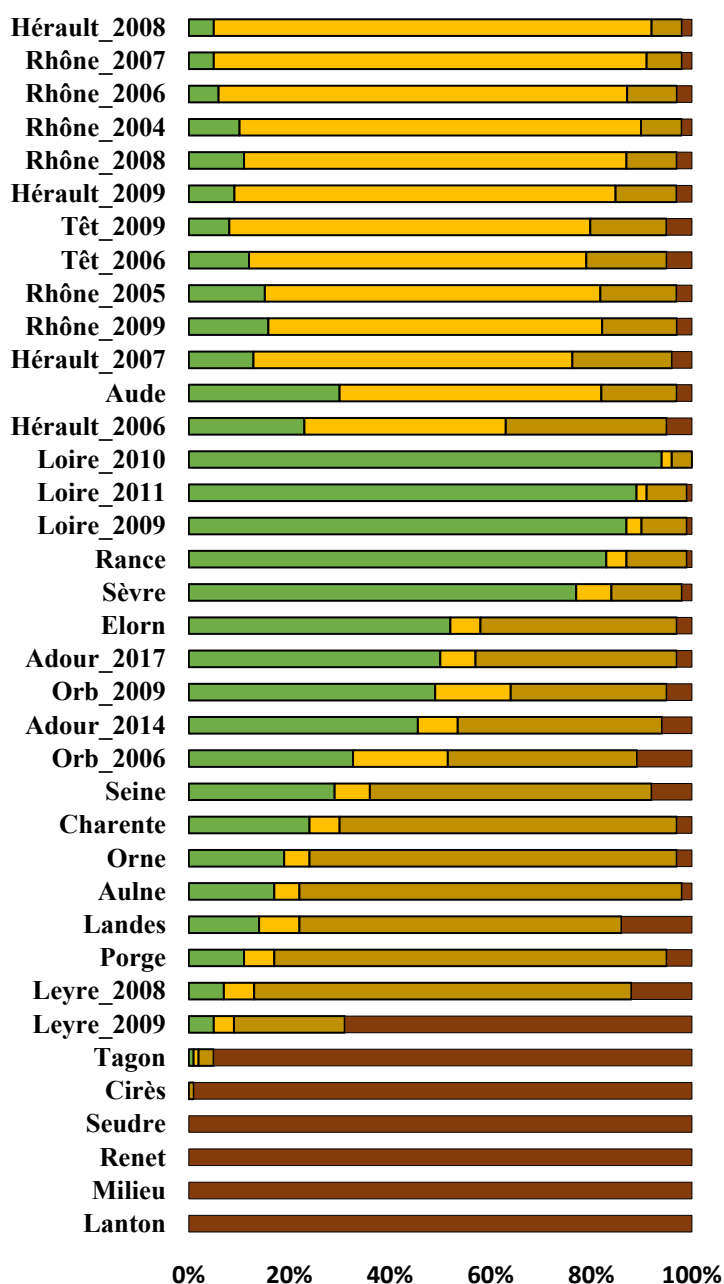

This will be better explained in the manuscript, and thanks to this comment, we will to better state the scope of our work.

**3-the choice of river systems .** Over the 23 studied rivers, a third (n=8) comes from the same close area, how can we make an appropriate typology with a such disequilibrium? Can we consider a bias with this over representation of these rivers characterizing the type I ? Why not decrease the number of these rivers and try to find another ones, outside the national territory?

We understand Reviewer 1's concern about the risk of representing the eight spatially closed little rivers. To test this potential bias, we performed again the fuzzy clustering, removing seven of these eight rivers (keeping only the Milieu River, representative of type I). It results that the typology is very similar to that of Fig. 5 and that Type I still stands with the Seudre and Milieu Rivers that still belong to this type. This indicates that this clustering is a robust analysis for performing such a typology because it is poorly dependent on sampling year and rivers, at least at the time and space scale of the study. This will be explained in section 2.6 of the revised manuscript.

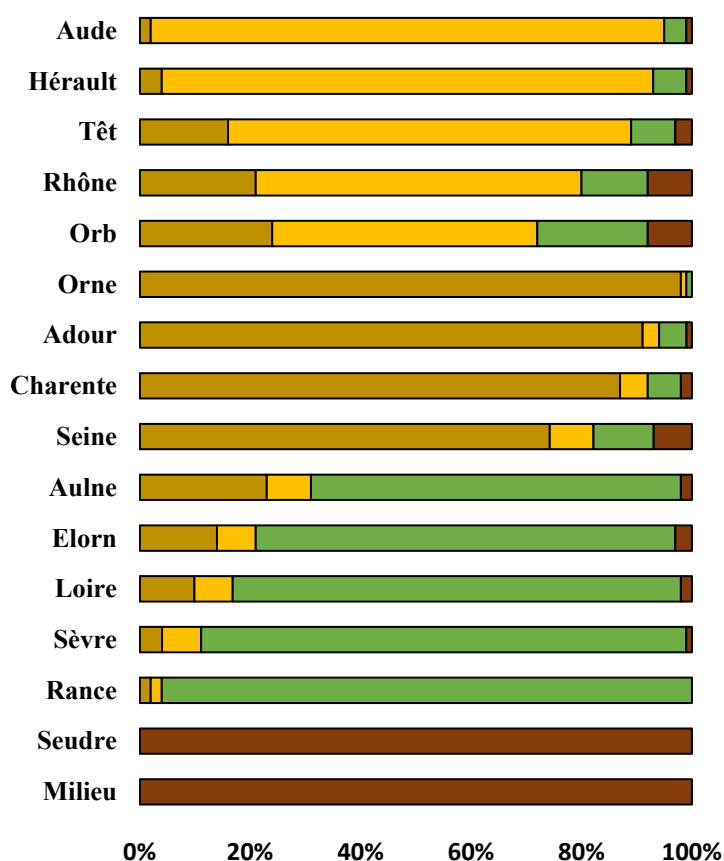

**4-metrics** . The choice of the metrics is debatable (section 2.5, L289f). As an example, the size of the drainage basin for which the water discharge is closely dependent (mostly): since the authors highlight on the role of the water discharge in the POM composition, the size of the drainage basin should be a key parameter controlling this parameter and the proportions of land cover (the larger the basin area, the greater the proportion (in surface) of cultivated area, as an example).

Authors should focus on the common metrics used in literature which try explain the water discharge and SPM flux (which is also a key metric for terrestrial POM) and test these ones. As an example, why there is no relief-derived metrics as slope of the main river corridor, relief of the drainage basin? Why authors used geographic coordinates? In the end, authors should also explain why they selected their different parameters and why they pushed others aside (even if some of them disappear to limit the problem of auto-correlation), in a new sub-section 2. As an

example, the choice to keep the wetlands area, the wind, pH etc. need more explanations (even if most of these parameters are finally useful).

We thank Reviewer 1 for the wise tips on new parameters to take into account. We will acquire the necessary data and add these parameters to perform RDAs (slope and river connectivity).

Indeed, all metrics used to perform multivariate analyses need to be justified, here as translators of potential environmental forcings to the POM dynamics.

In the case of river-specific RDAs, environmental forcing dynamics may explain local seasonal dynamics, as seasonal meteorological or hydrological dynamics (e.g., high wind energy may be linked to resuspension processes). They also served to assess the robustness of the mixing model by linking known parameters to be influenced by the source (e.g., chlorophyll *a* is a direct proxy of the living phytoplankton biomass, or pH may be indirectly lowered by living phytoplankton biomass).

In the case of the multi-rivers RDA, environmental forcings dynamics only explain the spatial dynamics between rivers, as the data input is only the annual mean. It permits to consider stable watershed forcings (on an annual scale), as soil properties and uses, or geographical coordinates, that may translate a latitudinal temperate climatic gradient (from degraded oceanic to Mediterranean climates).

We will consider this comment and improve the understandability of the different environmental drivers to POM dynamics.

Other minor comments, some of them belongs to these 4 major points.

L44f: I don't think this paragraph belongs to the abstract or if this paragraph is not at its place.

Will be considered.

L64f: it misses geological OM from erosion and weathering of sedimentary rocks.

Will be considered.

L70: compare to phytoplankton, yes, but mainly refractory is a bit exaggerated, this is a continuum of chemical composition leading with various labile and refractory POM.

Will be considered.

L78-81: authors should consider other drivers than river hydrodynamics as geomorphological, climatic, anthropogenic and even geological (lithologic) is their statement.

Will be considered.

L109f, 123: add the following idea: only in France with limited temperate river systems with an over-representation of small rivers in SW France.

Indeed, our work is restricted to Western Europe. It will be considered.

L156f: why the authors use wind data, it could be interesting to use it for the objectives of this work, but authors should state why it is important.

See the 4-metrics issue answer.

L161f: I wonder if these spatial databases are at the same resolution, authors should at least give the resolution and explain the harmonization between databases to get a unique scale.

Technically, datasets for soil organic carbon data were retrieved as a raster, Corine Land Cover as a polygon map, and erosional soil data as a punctual map. Each dataset was cut according to each watershed, then averaged individually. This pattern ensures that each value is a real average of each watershed and that there is harmony between the resulting parameters. We will add this information to the manuscript.

L175 & 177f, 217: see general comment n°1

Will be considered.

L187: PN/SPM need reference

PN/SPM ratio was used to distinguish sources for rivers where consensual discriminators were not available (chlorophyll *a* and phaeopigments). Although it has not been documented as a phytoplankton descriptor, the PN/SPM ratio seemed appropriate for this source in our study.

L246, 288f: see general comment n°4

The pertinence of parameters used to qualify the isotopic variability of certain sources is discussed, as for the nitrates (that Reviewer 1 noted L288f) at L189-191 of the manuscript.

L317: give the name of the rivers

Will be considered.

L364: to be checked with the format of the journal, but maybe no need to use mol/mol.

We understand the cumbersome nature of this notation. However, we would like to avoid any confusion about the mol/mol nature of the C/N ratio, while it cohabits with C/N ratios expressed in g/g in the literature (sometimes implicitly).

L365: which pigment concentration, phaeopigment or chlorophyll?

Chlorophyll *a*, phaeopigments, or the sum of both. Will be considered.

L375: values are a bit low for terrestrial plants, how can you explain that? (see Lamb et al., 2006, Earth Sci. Rev.).

See the answer of the 1-Litospheric origin. We do not consider the refractory terrestrial POM originating from fresh terrestrial plants (or fresh litter; C/N ratio always > 12 mol/mol), but from eroded mineral-dominated soils or resuspended riverbed sediment, possibly associated with bacteria (same Fig. in Lamb et al. 2006). In that case, the low C/N ratio signatures of

refractory terrestrial POM are consistent with those of these sources (l. 501 to 508 of the manuscript).

L443 450f: terrestrial POM is commonly linked to SPM concentration, and due to surface processes, in turn SPM concentration is commonly linked to water discharge, but the direct link terrestrial POM concentration with water discharge is hard to believe. How explain the difference of labile (water discharge) and refractory (SPM) links since most of these materials comes from soil erosion.

We agree with Reviewer 1 that high SPM is usually driven by flood, so high river flows. The slight decoupling shown in the redundancy analyses has multiple causes.

In the Milieu River, since there is a dominance of terrestrial matter (so a weak source dynamics), SPM is strongly correlated with the POC dynamics, so both POC sources, while river flow induced more POC of terrestrial origin, where the minimum of phytoplankton proportion was found.

In the Charente and Rance Rivers, if river flow is correlated with more labile terrestrial POM than SPM, the latter is also linked with phytoplankton bloom, responsible for bulk POC and SPM peaks. Moreover, high phytoplankton proportions may also be linked with low river flows.

In the Hérault River, even if they are closer to one terrestrial source, both river flows and SPM are correlated with both terrestrial sources. This slight decoupling may come from processes of resuspension that can be triggered by other forcings than high river flows (as wind, poorly shown here).

We will consider this commentary to improve the RDAs discussion.

L469f, 564f: how can you explain that? the higher the temperature, the higher the proportion of refractory terrestrial OM? In addition, most of the time, erosion in this area (with the exception of heavy rainfall) occurs in autumn, winter and spring times, where the temperature is pretty low...

The multi-site RDA is set as an average year, so without any temporal information (see 4-metrics answer). Here, the rivers with the highest average temperature are the Mediterranean ones, logically, the only ones where we considered refractory terrestrial POM. Since this bias is understood, no real environmental information can be extracted from this correlation.

L543f: why there is no discussion about refractory terrestrial OM and their relation with metrics? this was however in the result section - even if it is hard to believe the link with temperature. Also: authors used a lot of parameters (quite disputable, especially geomorphic parameters but also climatic wind)), but there is no words about the absence of discussion (even add sentence about the bad relations, as seen in figure 7).

We agree. A discussion will be added about the environmental drivers to the refractory terrestrial dynamics across rivers, given the new RDA performed with more pertinent parameters (slope, connectivity).

L577f: see general comment n°1, I quite disagree, since: there is no consideration for geological OM, no consideration of sedimentary cascade which increase terrestrial POM processes in river



corridors - the link the authors highlighted is mainly due to their choice they made. river connectivity for example should be interesting to test as the slope of the main river corridor. such parameters can be easily calculated, I suggest to test other significant parameters rather to be speculative with sediment resuspension (even this could have a link).

In addition to the precedent answer, we assure that we will revise our hypothesis depending on the new results, better integrating watershed processes.

L632f: add with our definition of the labile or refractory character at the beginning of this sentence. Also considering the fig.6, labile terrestrial POM is also linked to SPM. In the end, I suggest to use a correlation matrix and other statistical tests.

Indeed, correlations between the environmental parameters are not treated here. We will consider adding statistical univariate correlations when necessary.

L642: in that sense, terrestrial POM should be linked with SPM too? why this is not the case.?

After checking, SPM was removed from the multi-site RDA for its weakness in the variance representation (short arrow). It seems that rivers with an average phytoplankton dominance induced as high SPM concentrations as rivers with an average terrestrial dominance.

Figure A4-A5: Loire is missing

You are right. Since the Loire River sources proportions and RDA had already been published (Ferchiche et al. 2024), we decided not to duplicate these specific results in this manuscript.

Ferchiche F, Liénart C, Charlier K, Coynel A, Gorse-Labadie L and Savoye N (2024) Quantifying particulate organic matter: source composition and fluxes at the river-estuary interface. *Front. Freshw. Sci.* 2:1437431. doi: 10.3389/ffwsc.2024.1437431

Call of references in the text: follow the order of publication year according the journal (younger to older or vice versa).

Will be considered.
